# Supplementary material
Source: Research Square preprint supplement (doi:10.21203/rs.3.rs-9179366/v1)
Supplement: Supplementary file 1 [file ecd45b2a18d21ec03a208f62.docx]

**Supplementary Materials**

**Fig. S1.** Solvent Accessible Surface Area (SASA) and Molecular Surface Area (MolSA) profiles. Time-dependent SASA trajectories for the (A) VP40 and (B) NP complexes. MolSA trajectories for the (C) VP40 and (D) NP complexes.

**Fig. S2.** Van der Waals Surface Area (VSA) and intra-molecular hydrogen bond profiles. Time-dependent VSA trajectories for the (A) VP40 and (B) NP complexes. Evolution of intra-molecular hydrogen bonds for the (C) VP40 and (D) NP complexes.


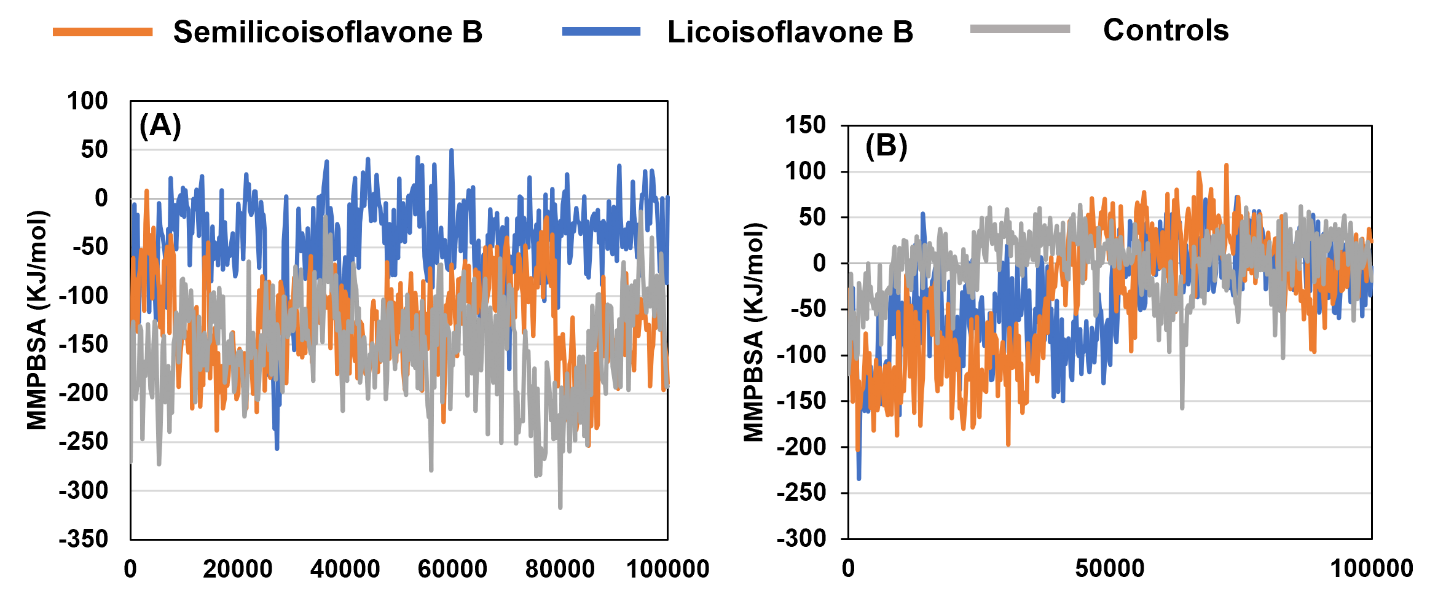


**Fig. S3.** MM-PBSA binding free energy decomposition. Energy contribution profiles for the (A) VP40 and (B) NP complexes.

**Fig. S4.** Principal Component Analysis (PCA) of the VP40 complexes. 3D projection of the first three principal components (PC1, PC2, PC3) for the (A) Semilicoisoflavone B, (B) Licoisoflavone B, and (C) Laurifolin (control) complexes.

**Fig. S5.** Principal Component Analysis (PCA) of the NP complexes. 3D projection of the first three principal components (PC1, PC2, PC3) for the (A) Semilicoisoflavone B, (B) Licoisoflavone B, and (C) Laurifolin (control) complexes.

**Fig. S6.** (A) UV-visible and (B) FT-IR analysis of lead compounds Semilicoisoflavone B (SLB) and Licoisoflavone B (LFB) compared with corresponding controls Laurifolin (LRF) and Licochalcone A (LCA).

**Table S1.** Docking score of ligands with target proteins VP40 and NP of the Ebola virus.

| **Phytochemical name** | **CID** | **Binding Affinity** | |
| --- | --- | --- | --- |
|  |  | **VP-40** | **Nucleoprotein** |
| Kanzonol T | 101999902 | -9.2 | -9.2 |
| Semilicoisoflavone B | 5481948 | -10 | -9.2 |
| Kanzonol V | 102444980 | -9.9 | -9.1 |
| Paratocarpin B | 42607541 | -10.3 | -9.1 |
| Glyinflanin G | 15233561 | -10.7 | -9 |
| Xambioona | 14769500 | -10.6 | -8.9 |
| Kanzonol W | 15380912 | -10.2 | -8.6 |
| Glabrocoumarone B | 15233562 | -10.1 | -8.6 |
| (3beta,20alpha,21alpha)-3,21-Dihydroxy-11-oxoolean-12-en-29-oic acid | 46173993 | -10.3 | -8.6 |
| Isoglycyrol | 124050 | -9.3 | -8.6 |
| Glabrone | 5317652 | -9.6 | -8.6 |
| Deoxoglabrolide | 101280183 | -10.9 | -8.5 |
| 11-Deoxyglycyrrhetinic Acid | 12305517 | -10.8 | -8.5 |
| 3'-Methoxyglabradin | 15228663 | -9.1 | -8.5 |
| Phaseollinisoflavan | 162412 | -9.7 | -8.4 |
| onocerin | 42608308 | -10 | -8.4 |
| 21alpha-Hydroxyisoglabrolide | 101280184 | -10.7 | -8.3 |
| 3,3',4,5'-Tetrahydroxy-4',5-diprenylbibenzyl | 10362492 | -9.1 | -8.3 |
| Abssinone II | 7330517 | -9.1 | -8.2 |
| 4-Hydroxylonchocarpin | 5889042 | -9.5 | -8.2 |
| Glycyrol | 5320083 | -9.1 | -8.2 |
| isoononin | 5318619 | -9.5 | -8.1 |
| Glyinflanin B | 480799 | -9.3 | -8.1 |
| 6,8-diprenylorobol | 487089 | -9.4 | -8.1 |
| Phaseollinisoflavan | 162412 | -9.7 | -7.9 |
| (3beta,18alpha,20beta)-3,18-Dihydroxy-11-oxoolean-12-en-29-oic acid | 101280181 | -11 | -7.9 |
| Ononin | 442813 | -9.6 | -7.9 |
| Licoflavone A | 5319000 | -9 | -7.9 |
| Quercitrin | 5280459 | -9 | -7.8 |
| (+)-Licoricidin | 480865 | -9.1 | -7.8 |
| Licoisoflavone B | 5481234 | -10.3 | -9.7 |
| Glabroisoflavanone B | 11405466 | -9.2 | -8.3 |
| Glycyrrhisoflavanone | 5317762 | -9.5 | -8.5 |
| Licoisoflavanone | 392443 | -9.7 | -7.9 |

**Table S2.** Evaluation of the physicochemical properties, lipophilicity, and drug-likeness parameters of the chosen compounds using the SwissADME online server.

| **phytochemica name** |  | **Drug Likeness Parameters** | | | | | | | **Violation** | | |
| --- | --- | --- | --- | --- | --- | --- | --- | --- | --- | --- | --- |
| **Ccompound**  **CID** | **MW (g/mol)** | **nRB** | **nHBA** | **nHBD** | **MR** | **TPSA** | **iLOGP** | **L** | **V** | **E** |
| Kanzonol T | 101999902 | 438.47 | 4 | 7 | 4 | 123.5 | 120.36 | 3.69 | 0 | 0 | 0 |
| Semilicoisoflavone B | 5481948 | 352.34 | 1 | 6 | 3 | 98.11 | 100.13 | 3.05 | 0 | 0 | 0 |
| Kanzonol V | 102444980 | 376.44 | 3 | 4 | 2 | 113.54 | 62.83 | 3.97 | 0 | 0 | 1 |
| Paratocarpin B | 42607541 | 390.47 | 5 | 4 | 2 | 118.14 | 66.76 | 4.06 | 0 | 0 | 0 |
| Glyinflanin G | 15233561 | 404.46 | 3 | 5 | 2 | 118.54 | 75.99 | 3.94 | 0 | 0 | 0 |
| Xambioona | 14769500 | 388.46 | 1 | 4 | 0 | 113.74 | 44.76 | 4.16 | 0 | 0 | 0 |
| Kanzonol W | 15380912 | 336.34 | 1 | 5 | 2 | 96.09 | 79.9 | 2.74 | 0 | 0 | 0 |
| Glabrocoumarone B | 15233562 | 308.33 | 1 | 4 | 2 | 89.82 | 62.83 | 3.11 | 0 | 0 | 0 |
| (3beta,20alpha,21alpha)-3,21-Dihydroxy-11-oxoolean-12-en-29-oic acid | 46173993 | 486.68 | 1 | 5 | 3 | 138.02 | 94.83 | 3.12 | 0 | 0 | 0 |
| Isoglycyrol | 124050 | 366.36 | 1 | 6 | 1 | 102.08 | 82.04 | 3.3 | 0 | 0 | 0 |
| Glabrone | 5317652 | 336.34 | 1 | 5 | 2 | 96.09 | 79.9 | 2.78 | 0 | 0 | 0 |
| Deoxoglabrolide | 101280183 | 454.68 | 0 | 3 | 1 | 134.05 | 46.53 | 4.15 | 1 | 0 | 1 |
| 11-Deoxyglycyrrhetinic Acid | 12305517 | 456.7 | 1 | 3 | 2 | 136.65 | 57.53 | 3.86 | 1 | 0 | 1 |
| 3'-Methoxyglabradin | 15228663 | 354.4 | 2 | 5 | 2 | 99.74 | 68.15 | 3.49 | 0 | 0 | 0 |
| Phaseollinisoflavan | 162412 | 324.37 | 1 | 4 | 2 | 93.25 | 58.92 | 3.08 | 0 | 0 | 0 |
| onocerin | 42608308 | 456.74 | 3 | 2 | 2 | 142.75 | 40.46 | 4.88 | 1 | 0 | 1 |
| 21alpha-Hydroxyisoglabrolide | 101280184 | 484.67 | 0 | 5 | 2 | 135.45 | 83.83 | 3.47 | 0 | 0 | 0 |
| 3,3',4,5'-Tetrahydroxy-4',5-diprenylbibenzyl | 10362492 | 382.49 | 7 | 4 | 4 | 116.23 | 80.92 | 4.13 | 0 | 0 | 0 |
| Abssinone II | 7330517 | 324.37 | 3 | 4 | 2 | 93.27 | 66.76 | 2.83 | 0 | 0 | 0 |
| 4-Hydroxylonchocarpin | 5889042 | 322.35 | 3 | 4 | 2 | 94.42 | 66.76 | 3.06 | 0 | 0 | 0 |
| Glycyrol | 5320083 | 366.36 | 3 | 6 | 2 | 104.02 | 93.04 | 3.19 | 0 | 0 | 0 |
| isoononin | 5318619 | 430.4 | 5 | 9 | 4 | 108.56 | 138.82 | 2.4 | 0 | 0 | 1 |
| Glyinflanin B | 480799 | 338.35 | 4 | 5 | 2 | 94.52 | 83.83 | 2.61 | 0 | 0 | 0 |
| 6,8-diprenylorobol | 487089 | 424.49 | 5 | 6 | 4 | 121.03 | 107.22 | 3.47 | 0 | 0 | 0 |
| Phaseollinisoflavan | 162412 | 324.37 | 1 | 4 | 2 | 93.25 | 58.92 | 3.08 | 0 | 0 | 0 |
| (3beta,18alpha,20beta)-3,18-Dihydroxy-11-oxoolean-12-en-29-oic acid | 101280181 | 486.68 | 1 | 5 | 3 | 138.05 | 94.83 | 2.99 | 0 | 1 | 0 |
| Ononin | 442813 | 430.4 | 5 | 9 | 4 | 108.56 | 138.82 | 2.65 | 0 | 0 | 1 |
| Licoflavone A | 5319000 | 322.35 | 3 | 4 | 2 | 95.69 | 70.67 | 2.9 | 0 | 0 | 0 |
| Quercitrin | 5280459 | 448.38 | 3 | 11 | 7 | 109 | 190.28 | 1.6 | 2 | 1 | 1 |
| (+)-Licoricidin | 480865 | 424.53 | 6 | 5 | 3 | 125.08 | 79.15 | 3.98 | 0 | 0 | 0 |
| Glabroisoflavanone B | 11405466 | 352.38 | 2 | 5 | 1 | 98.14 | 64.99 | 2.89 | 0 | 0 | 0 |
| Glycyrrhisoflavanone | 5317762 | 368.38 | 2 | 6 | 2 | 100.16 | 85.22 | 2.8 | 0 | 0 | 0 |
| Licoisoflavanone | 392443 | 354.35 | 1 | 6 | 3 | 95.69 | 96.22 | 2.71 | 0 | 0 | 0 |
| Licoisoflavone B | 5481234 | 352.34 | 1 | 6 | 3 | 98.11 | 100.13 | 2.89 | 0 | 0 | 0 |
| MW (Molecular Weight) < 500, nRB (Number of Rotatable Bond) < 10, nHBA (Number of Hydrogen Bond Acceptor) < 10, nHBD (Number of Hydrogen Bond Donor) < 5, MR (Molar Refractivity) ≥40 - ≤130, TPSA (Topological Polar Surface Area) ≤ 140, iLOGP (Lipophilicity) < 5, L(Lipinski’s) ≤ 1, V (Veber) ≤ 1, E (Egan) ≤ 1 | | | | | | | | | | | |

**Table S3.** ADME properties of selected ligands from the library of *Glycyrrhiza glabra* plant natural products.

| **Phytochemical Name** | **Compound CID** | **Absorption** |  | **Distribution** |  | **Metabolism** | | | |
| --- | --- | --- | --- | --- | --- | --- | --- | --- | --- |
|  |  | **Water Solubility** | **Intestinal Absorption**  **(Human)** | **Volume of Distribution**  **(Human)** | **Blood-Brain Barrier**  **Permeability** | **CYP** | | | |
| **2D6** | **3A4** | **2D6** | **3A4** |
| **Substrate** | | **Inhibitor** | |
|  |  | **Numeric (log mo1/L)** | **Numeric (% Absorbed)** | **(Log L/Kg)** | **Numeric (log BB)** | **Categorical (Yes/No)** | | | |
| Kanzonol T | 101999902 | -4.142 | 91.528 | -0.028 | -0.028 | No | Yes | No | No |
| Semilicoisoflavone B | 5481948 | -3.485 | 98.022 | 0.486 | -0.937 | No | Yes | No | **No** |
| Paratocarpin B | 42607541 | -5.636 | 90.429 | 0.401 | -0.077 | No | Yes | No | Yes |
| Glyinflanin G | 15233561 | -4.745 | 91.219 | 0.346 | -0.156 | No | Yes | No | Yes |
| Xambioona | 14769500 | -5.16 | 96.58 | 96.58 | 0.385 | No | Yes | No | Yes |
| Kanzonol W | 15380912 | **-**3.362 | 95.101 | 0.485 | -0.045 | No | Yes | No | **Yes** |
| Glabrocoumarone B | 15233562 | -3.831 | 93.053 | 0.565 | 0.08 | No | Yes | No | Yes |
| (3beta,20alpha,21alpha)-3,21-Dihydroxy-11-oxoolean-12-en-29-oic acid | 46173993 | -6.28 | 94.753 | 0.913 | 0.202 | No | Yes | No | No |
| Isoglycyrol | 124050 | -3.71 | 95.642 | 0.225 | -0.487 | No | Yes | No | Yes |
| Glabrone | 5317652 | -3.635 | 96.194 | 0.394 | 0.031 | No | Yes | No | Yes |
| 3'-Methoxyglabradin | 15228663 | -3.898 | 94.29 | 0.475 | -0.223 | No | Yes | No | Yes |
| Phaseollinisoflavan | 162412 | -3.773 | 93.454 | 0.571 | 0.134 | No | Yes | No | Yes |
| 21alpha-Hydroxyisoglabrolide | 101280184 | -5.43 | 95.205 | 0.087 | -0.138 | No | Yes | No | Yes |
| 3,3',4,5'-Tetrahydroxy-4',5-diprenylbibenzyl | 10362492 | -3.827 | 88.88 | 0.012 | -0.766 | No | Yes | No | No |
| Abssinone II | 7330517 | -3.935 | 92.441 | 0.409 | 0.502 | No | Yes | No | Yes |
| 4-Hydroxylonchocarpin | 5889042 | -3.571 | 92.977 | 0.417 | -0.17 | No | Yes | No | Yes |
| Glycyrol | 5320083 | -3.938 | 97.539 | 0.024 | -0.429 | No | Yes | No | Yes |
| Glyinflanin B | 480799 | -3.55 | 91.056 | 0.221 | -0.132 | No | Yes | No | Yes |
| 6,8-diprenylorobol | 487089 | -3.727 | 81.563 | -0.148 | -0.989 | No | Yes | No | Yes |
| Phaseollinisoflavan | 162412 | -3.773 | 93.454 | 0.571 | 0.134 | No | Yes | No | Yes |
| (3beta,18alpha,20beta)-3,18-Dihydroxy-11-oxoolean-12-en-29-oic acid | 101280181 | -4.477 | 77.905 | -0.501 | -0.574 | No | Yes | No | Yes |
| Licoflavone A | 5319000 | -4.207 | 93.554 | 0.353 | 0.04 | No | Yes | No | Yes |
| (+)-Licoricidin | 480865 | -4.463 | 90.824 | 0.108 | -1.001 | No | Yes | No | No |
| Licopyranocoumarin | 122851 | -3.487 | 85.283 | 0.362 | -1.119 | No | No | No | No |
| Hemileiocarpin | 629440 | -5.242 | 96.069 | 0.76 | 0.315 | No | Yes | No | No |
| Licoisoflavone B | 5481234 | -3.544 | 90.671 | 0.505 | -0.89 | No | No | No | No |
| Glabroisoflavanone B | 11405466 | -4.85 | 96.262 | 0.018 | -0.29 | No | No | Yes | No |
| Glycyrrhisoflavanone | 5317762 | -3.65 | 95.802 | 0.354 | -0.374 | No | Yes | No | Yes |
| Licoisoflavanone | 392443 | -6.135 | 95.983 | 0.288 | 0.124 | No | Yes | No | Yes |

**Table S4.** Average binding affinities and Non bond interactions between amino acid residues of VP40 and selected four compounds.

| Name | Binding  affinity (kcal/  mol) | Residue in  contact | Interaction type | Bond  distance(Å) |
| --- | --- | --- | --- | --- |
| Licoisoflavone B | -10.3 | GLN155 | H | 2.87473 |
| ARG214 | H | 2.47202 |
| ARG214 | H | 2.42897 |
| LEU98 | H | 2.19875 |
| GLY99 | H | 3.53165 |
| LEU288 | C | 3.48685 |
| ARG214 | C | 4.72045 |
| PHE157 | PC | 5.44993 |
| PHE157 | PPT | 4.75559 |
| VAL100 | PPT | 4.13835 |
| Semilicoisoflavone B | -10 | GLN155 | H | 2.58692 |
| ARG214 | H | 2.67042 |
| ARG214 | H | 2.44576 |
| ARG214 | H | 2.7087 |
| HIS315 | H | 2.33501 |
| ALA156 | H | 2.25132 |
| LEU288 | C | 3.58217 |
| ARG214 | PC | 4.62147 |
| PHE157 | PPT | 4.75763 |
| VAL100 | A | 4.07676 |
| Laurifolin | -8.8 | LEU288 | H | 2.53759 |
| (Control) |  | ARG151 | H | 2.70562 |
|  |  | ARG151 | H | 2.15727 |
|  |  | LEU217 | A | 5.3795 |
|  |  | LEU288 | PA | 5.44421 |

**Table S5.** Average binding affinities and non-bond interactions between amino acid residues of nucleoprotein (NP) and selected four compounds.

| Name | Binding  affinity (kcal/  mol) | Residue in  contact | Interaction  type | Bond  distance(Å) |
| --- | --- | --- | --- | --- |
| Licoisoflavone B | -9.7 | ASN207 | H | 1.82726 |
| ASN207 | H | 2.55351 |
| ASP71 | H | 2.47543 |
| ASP65 | PA | 3.67056 |
| ARG202 | A | 5.32002 |
| LEU203 | A | 4.52837 |
| VAL199 | A | 4.81215 |
| LEU203 | A | 4.26157 |
| ALA70 | PA | 4.6791 |
| ALA70 | PA | 4.4823 |
| Semilicoisoflavone B | -9.2 | PHE66 | H | 1.81133 |
| ASN207 | H | 1.8618 |
| ASN207 | H | 2.51624 |
| ASP71 | H | 2.52297 |
| ASP65 | PA | 3.69519 |
| ARG202 | A | 5.1975 |
| LEU203 | A | 4.68258 |
| VAL199 | A | 5.07812 |
| LEU203 | A | 3.57295 |
| ALA70 | PA | 4.73114 |
| ALA70 | PA | 4.47271 |
| Licochalcone A (Control) | -7.3 | PHE66 | H | 2.15059 |
|  | VAL199 | H | 1.85115 |
|  | LEU203 | PS | 3.88436 |
|  | ALA70 | A | 3.70078 |
|  | ALA70 | PA | 5.13456 |

**Table S6.** Quantum chemical parameters of compounds calculated at the level of theory RB3LYP/6-311G + (d,p).

| **Name** | **∊HOMO** | **∊LUMO** | **Gap** | **(χ)** | **(μ)** | **(η)** | **(ω)** | **(S)** |
| --- | --- | --- | --- | --- | --- | --- | --- | --- |
| Semilicoisoflavone B | -5.72 | -1.51 | 4.21 | 3.62 | -3.62 | 2.10 | 3.11 | 0.24 |
| Licoisoflavone B | -5.64 | -1.96 | 3.69 | 3.80 | -3.80 | 1.84 | 3.91 | 0.27 |
| Laurifolin  (Control) | -6.27 | -1.86 | 4.41 | 4.06 | -4.06 | 2.20 | 3.75 | 0.23 |
| Licochalcone A  (Control) | -5.94 | -1.87 | 4.07 | 3.91 | -3.91 | 2.03 | 3.75 | 0.25 |

**Note:** hardness (η), softness (S), chemical potential (μ), electronegativity (χ), and electrophilicity (ω)

**Table S7.** Electronic absorption of selected compounds and corresponding controls calculated at TD-DFT /6-311g+ (d, p) level of theory.

| Name | Excited  state | Wavelength  (nm) | Excitation  energy(eV) | Configurations composition | Oscillator  strength |
| --- | --- | --- | --- | --- | --- |
| Semilicoisoflavone B | S0→S1 | 384.38 | 3.090 | H-3→L (-0.167),  H-2→L (0.561), H→L (0.354) | 0.005 |
| Licoisoflavone B | S0→S1 | 534.00 | 0.853 | H-2→L (0.107), H→L (0.693) | 0.006 |
| Laurifolin(Control) | S0→S1 | 285.60 | 3.7110 | H-1→L+3 (0.103)  H→L (0.686) | 0.041 |
| Licochalcone A (Control) | S0→S1 | 496.31 | 2.066 | H→L (0.705) | 0.001 |

**Table S8.** Vibrational frequencies of lead compounds and control drugs.

| Name | Assignment | Vibrational frequency (cm-1) |
| --- | --- | --- |
| Scaled value |
| Semilicoisoflavone B | νO-H | 3658.51 |
| νC-H | 2942.83 |
| νC=O | 1659.21 |
| ν(C=C Aromatic) | 1615.73 |
| Licoisoflavone B | νO-H | 3214.10 |
|  | νC-H | 2932.38 |
|  | νC=O | 1615.83 |
|  | ν(C=C Aromatic) | 1610.02 |
| Laurifolin (control) | νO-H | 3243.51 |
|  | νC-H | 2943.05 |
|  | νC=O | 1625.82 |
|  | νC=C | 1602.99 |
|  | ν(C=C Aromatic) | 1558.74 |
| Licochalcone A (control) | νO-H | 3712.12 |
|  | νC-H | 2915.21 |
|  | νC=O | 1629.15 |
|  | νC=C | 1605.99 |
|  | ν(C=C Aromatic) | 1555.42 |
